# Supplementary material for: Triple Reporter Assay: A Non-Overlapping Luciferase Assay for the Measurement of Complex Macromolecular Regulation in Cancer Cells Using a New Mushroom Luciferase–Luciferin Pair
Source: MDPI journal article supplement (doi:10.3390/s23177313), 2023-08-22
Supplement: s1 [file s1]

## Supplementary information

### Triple Reporter Assay: A non-overlapping luciferase assay for measurement of complex macromolecular regulation in cancer cells using a new mushroom luciferase-luciferin pair

#### Authors –

Aaiyas Mujawar<sup>1,3</sup>, Pratham Phadte<sup>2,3</sup>, Ksenia A. Palkina<sup>4,5</sup>, Nadezhda M. Markina<sup>4,5</sup>, Ameena Mohammad<sup>1</sup>, Bhushan L. Thakur<sup>2,3</sup>, Karen S. Sarkisyan<sup>4,6</sup>, Anastasia V. Balakireva<sup>4,5</sup>, Pritha Ray<sup>2,3\*</sup>, Ilia Yamplosky<sup>4\*</sup> and Abhijit De<sup>1,3\*</sup>

#### Affiliations-

1. Molecular Functional Imaging Lab, Advanced Centre for Treatment, Research and Education in Cancer, Navi Mumbai, INDIA
2. Imaging Cell Signalling and Therapeutics Lab, Advanced Centre for Treatment, Research and Education in Cancer, Navi Mumbai, INDIA
3. Faculty of Life Science, Homi Bhabha National Institute, Mumbai, INDIA
4. Institute of Bioorganic Chemistry (IBCh), Russian Academy of Sciences, Moscow, RUSSIA.
5. Planta LLC, Bolshoi boulevard, 42 str 1, Moscow, Russia
6. Synthetic Biology Group, MRC London Institute of Medical Sciences, London W12 0NN, UK

#### \*Correspondence –

Dr Abhijit De

Molecular Functional Imaging Lab, Advanced Centre for Treatment, Research and Education in Cancer, Navi Mumbai, INDIA

Email: [ade@actrec.gov.in](mailto:ade@actrec.gov.in)

Dr Ilia Yamplosky

Institute of Bioorganic Chemistry (IBCh), Russian Academy of Sciences, Moscow, RUSSIA

Email: [ivyamp@gmail.com](mailto:ivyamp@gmail.com)

Dr Pritha Ray

Imaging Cell Signalling and Therapeutics Lab, Advanced Centre for Treatment, Research and Education in Cancer, Navi Mumbai, INDIA

Email: [pray@actrec.gov.in](mailto:pray@actrec.gov.in)

#### Other authors' email –

AM: [aaiyasmujawar@gmail.com](mailto:aaiyasmujawar@gmail.com)

PP: [pratham1122@gmail.com](mailto:pratham1122@gmail.com)

KP: [kpalkina93@gmail.com](mailto:kpalkina93@gmail.com)

NMM: [markina.nadya@gmail.com](mailto:markina.nadya@gmail.com)

AMM: [ami.cph.ami@gmail.com](mailto:ami.cph.ami@gmail.com)

BT: [bhushan0331@gmail.com](mailto:bhushan0331@gmail.com)

KS: [karen.s.sarkisyan@gmail.com](mailto:karen.s.sarkisyan@gmail.com)

AVB: [balakireva.anastacia@gmail.com](mailto:balakireva.anastacia@gmail.com)

**Supplementary Table S1.** Major chemicals and assay kits used in the study.

| <b>Chemical</b>                      | <b>Catalogue No.</b> | <b>Company</b>      |
|--------------------------------------|----------------------|---------------------|
| Doxorubicin                          | D1515                | Sigma               |
| Zeocin                               | R25001               | Thermofischer       |
| Ampicillin                           | 695203               | Sigma               |
| G418 disulfate salt                  | G9516                | Sigma               |
| BioTrace PVDF membrane               | 66485                | PALL                |
| D-Luciferin                          | L-8240               | Biosynth            |
| Coelenterazine h                     | C3230                | Sigma               |
| Nano-Glo®(Furimazine)                | N1110                | Promega             |
| TNF $\alpha$                         | AF-300-01A           | Peptotech           |
| WesternBright ECL kit                | K-12045-D20          | Advansta            |
| RNA extraction kit                   | 400800               | Agilent             |
| Superscript III (cDNA synthesis kit) | 11752050             | Thermo Fisher       |
| SYBR® Green PCR Master Mix           | 4309155              | Thermo Fisher       |
| Galacto-Light plus system            | T1007                | Applied biosystems  |
| RIPA lysis buffer                    | R0278                | Sigma               |
| 3-OH hispidin                        | -                    | Planta LLC          |
| NheI-HF                              | R3131                | New England Biolabs |
| MluI-HF                              | R3198                | New England Biolabs |
| DMEM                                 | 1210046              | GIBCO               |
| RPMI 1640                            | 31800022             | GIBCO               |
| Foetal bovine serum                  | RM10938              | HiMedia             |
| Lipofectamine 2000                   | 11668019             | Thermo Fischer      |

**Supplementary Table S2.** Oligo sequences used in the study

| Gene Name                       | Forward primer            | Reverse primer                   |
|---------------------------------|---------------------------|----------------------------------|
| <i>For hLuz cDNA cloning -</i>  |                           |                                  |
| hLuz                            | GTTGCTAGCGCCACCATGAGAATCA | ACGACGCGTTTTGGCGTTCTCGACAATCTTGC |
| <i>For real-time PCR -</i>      |                           |                                  |
| hLuz                            | AGCAGCAGATCTATCGCCAT      | TCTTTTCTCGGGCAGTCTGT             |
| GAPDH                           | TGCACCACCAACTGCTTAGC      | GGCATGGACTGTGGTCATGAG            |
| NF $\kappa$ BIA                 | CAATGGCCACACGTGTCTAC      | CATCAGCCCCACACTTCAAC             |
| <i>For CHIP real-time PCR -</i> |                           |                                  |
| p53                             | CGCACAGTACCGAACCCTTAT     | AATGCCAACAGAGACTTCAGAAATG        |
| NF $\kappa$ B                   | TACGCAGCACCAAGACACTA      | GACCTTTTGCTATGCCCTCA             |

**Supplementary Table S3.** Antibodies used in the study.

| <b>Antibody name</b>                                | <b>Catalogue No.</b> | <b>Company Name</b>                             |
|-----------------------------------------------------|----------------------|-------------------------------------------------|
| PIK3CA (p110 $\alpha$ ) pAb                         | 4255                 | Cell Signalling Technologies (Danvers, MA, USA) |
| phospho serine 15 p53 mAb                           | 9286                 | Cell Signalling Technologies (Danvers, MA, USA) |
| Total p53 pAb                                       | SC-6243              | Santacruz (Texas, USA)                          |
| NF $\kappa$ B (p65) pAb                             | AB7970               | Sigma-Aldrich (USA)                             |
| NanoLuc mAb                                         | N7000                | Promega (USA)                                   |
| Luz pAb                                             | NA                   | In house                                        |
| $\alpha$ -tubulin mAb                               | T5168                | Sigma-Aldrich (USA)                             |
| p21 mAb                                             | 12D1                 | Cell signaling technology                       |
| BCL2(N-19) mAb                                      | SC-7382              | Santa Cruz biotechnology                        |
| HRP-conjugated anti-mouse secondary antibodies mAb  | A5316                | Sigma-Aldrich (USA)                             |
| HRP-conjugated anti-rabbit secondary antibodies mAb | A0545                | Sigma-Aldrich (USA)                             |

**Supplementary Table S4.** Information on Luz and other luciferase used in triple luciferase assay system

| Luciferase                 | Organism                         | Molecular Weight | Emission Maxima | Substrate    | Reference |
|----------------------------|----------------------------------|------------------|-----------------|--------------|-----------|
| Firefly Luciferase (FLuc2) | <i>Photinus pyralis</i>          | 62 kD            | 609 nm          | D-luciferin  | [1]       |
| NanoLuciferase (NLuc)      | <i>Oplophorus gracilirostris</i> | 19 kD            | 460 nm          | Furimazine   | [2]       |
| Fungal Luciferase (Luz)    | <i>Neonothopanus nambi</i>       | 27 kD            | 525 nm          | 3OH-Hispidin | [3]       |

## References

1. Branchini, B.R.; Southworth, T.L.; Fontaine, D.M.; Kohrt, D.; Florentine, C.M.; Grossel, M.J. A Firefly Luciferase Dual Color Bioluminescence Reporter Assay Using Two Substrates To Simultaneously Monitor Two Gene Expression Events. *Sci. Reports 2018 81* **2018**, *8*, 1–7, doi:10.1038/s41598-018-24278-2.
2. Hall, M.P.; Unch, J.; Binkowski, B.F.; Valley, M.P.; Butler, B.L.; Wood, M.G.; Otto, P.; Zimmerman, K.; Vidugiris, G.; Machleidt, T.; et al. Engineered Luciferase Reporter from a Deep Sea Shrimp Utilizing a Novel Imidazopyrazinone Substrate. *ACS Chem. Biol.* **2012**, *7*, 1848–1857, doi:10.1021/cb3002478.
3. Purtov, K. V.; Petushkov, V.N.; Baranov, M.S.; Mineev, K.S.; Rodionova, N.S.; Kaskova, Z.M.; Tsarkova, A.S.; Petunin, A.I.; Bondar, V.S.; Rodicheva, E.K.; et al. The Chemical Basis of Fungal Bioluminescence. *Angew. Chemie - Int. Ed.* **2015**, *54*, 8124–8128, doi:10.1002/anie.201501779.

(a)

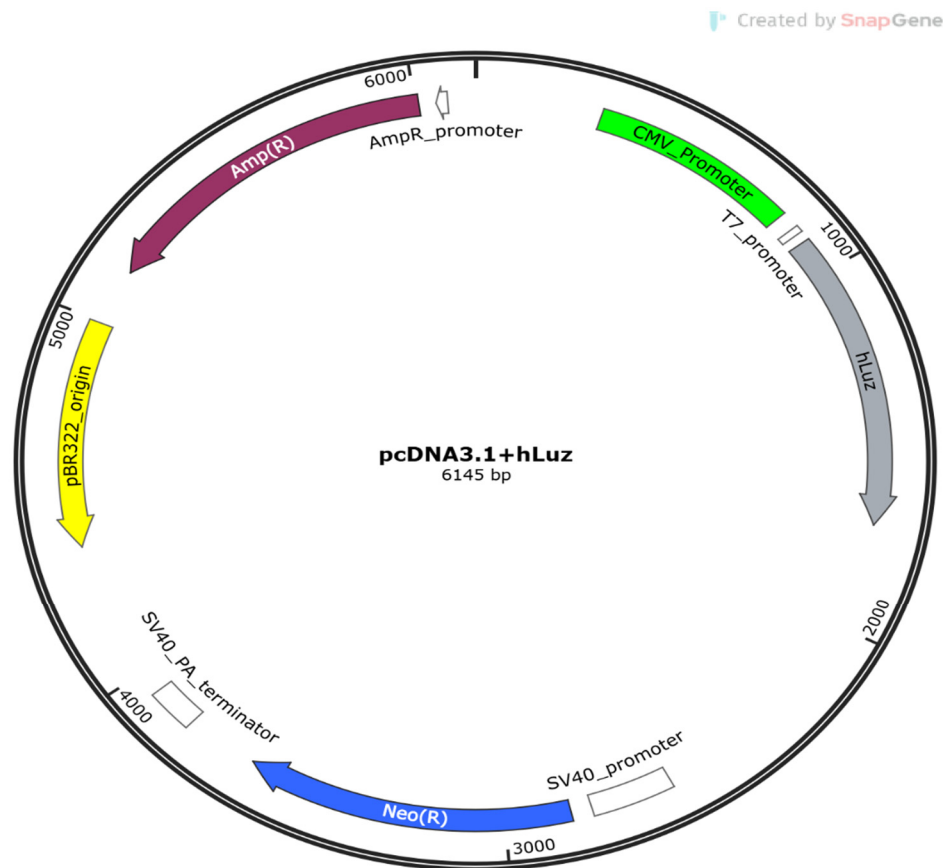

(b)

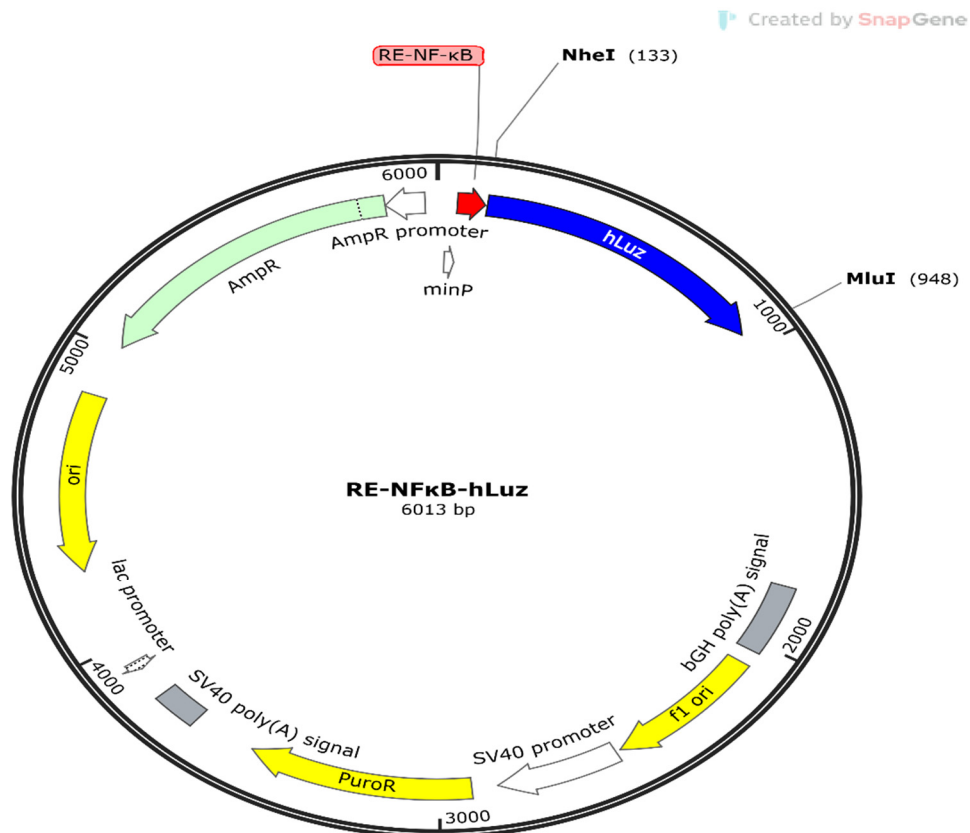

**Supplementary Figure S1.** Plasmid map of (a) pcDNA3.1+hLuz and (b) RE-NFκβ-hLuz expression vectors.

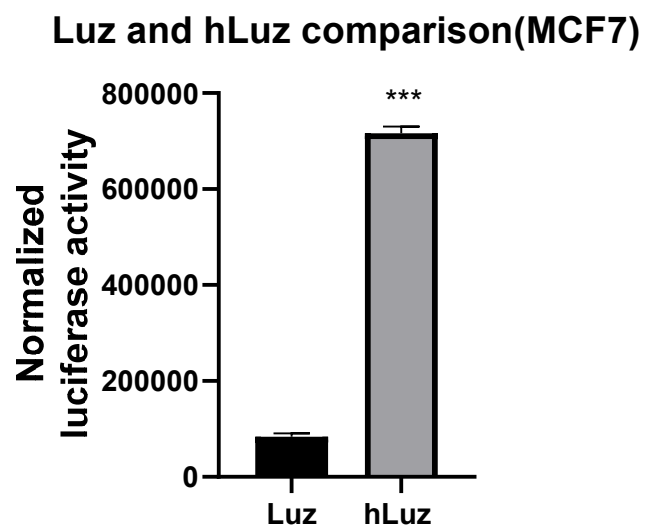

**Supplementary Figure S2.** Bar graph showing Luz and hLuz activity in MCF7 cell line. Photon output from 10000 cells was measured after adding 3-OH hispidin (1mg/ml).

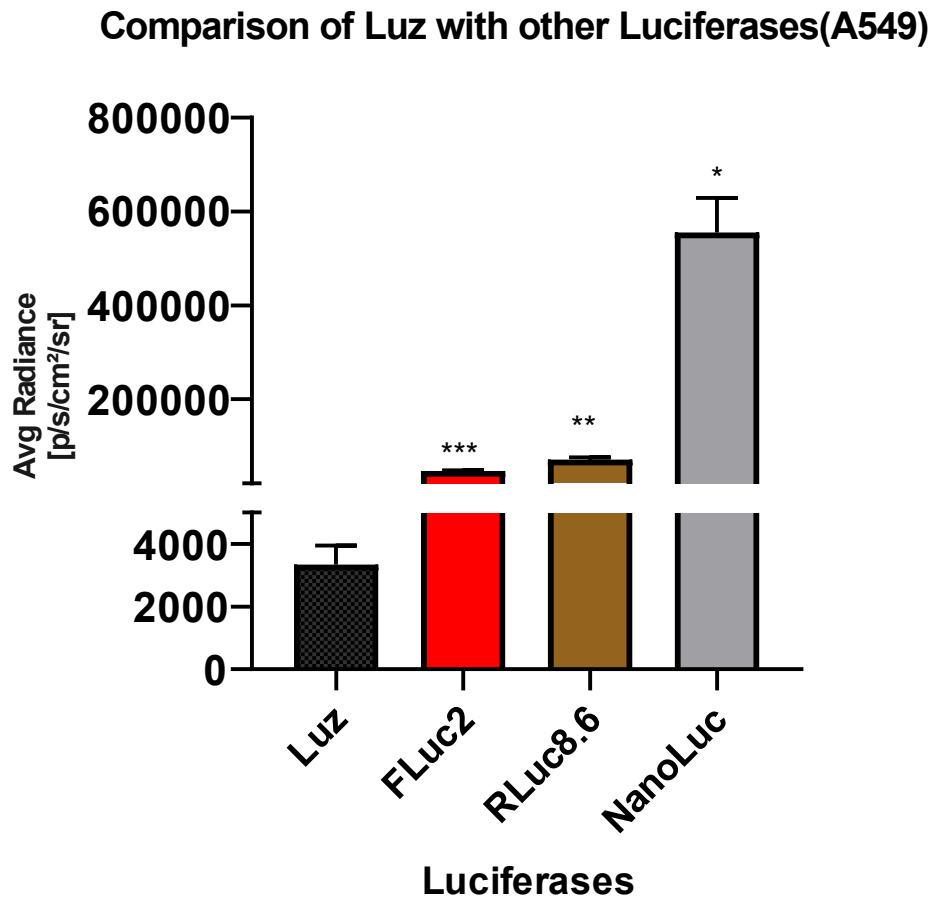

**Supplementary Figure S3.** Bar graph showing comparative luciferase activity of Luz with FLuc2, RLuc8.6 and NanoLuc in A549 cell line.

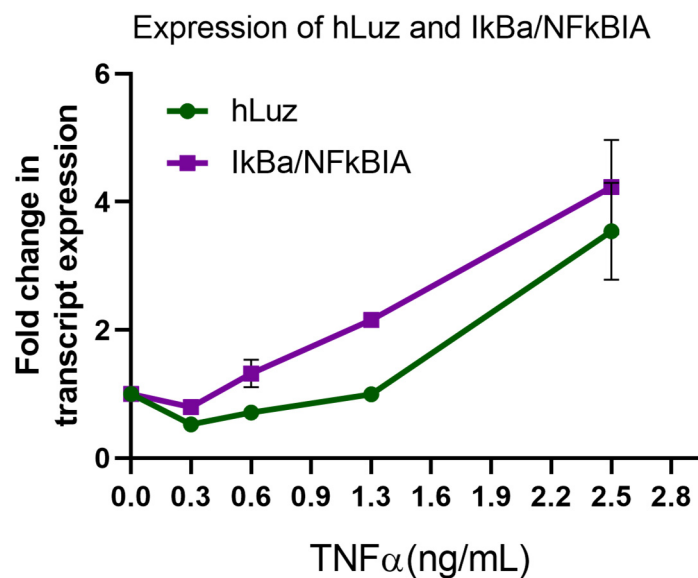

**Supplementary Figure S4.** Line graph showing fold change of hLuz and NFκβIA transcript expression compared to control in A2780-NhLuz cell line treated with variable TNFα concentration (0.3125,0.625,1.25 and 2.5 ng/mL) for 24h



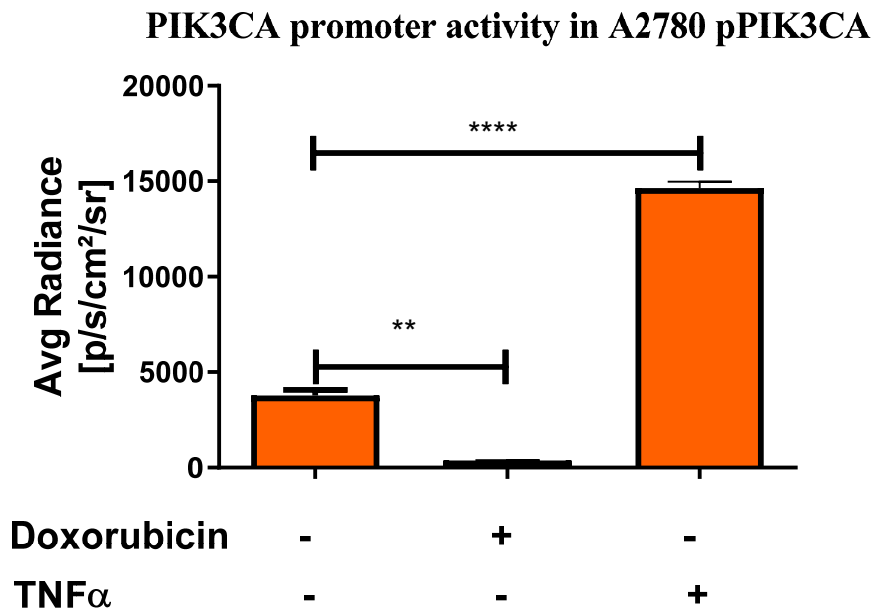

**Supplementary Figure S5.** Bar graph showing PIK3CA promoter activity in A2780pPIK3CA cell line after treatment of TNF $\alpha$  (10ng/ml) and Doxorubicin(1ug/ml) for 24h.

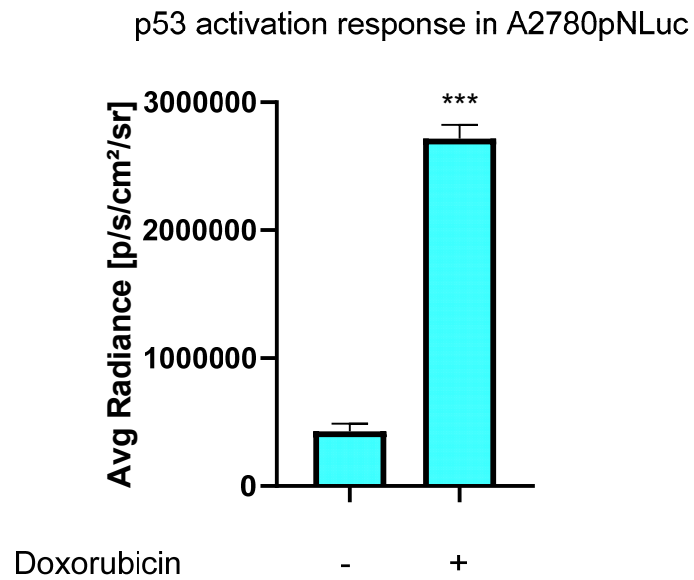

**Supplementary Figure S6.** Bar graph showing activation of p53 measured by NLuc activity in A2780 cell line over-expressing p53-NLuc fusion protein in presence or absence of Doxorubicin.

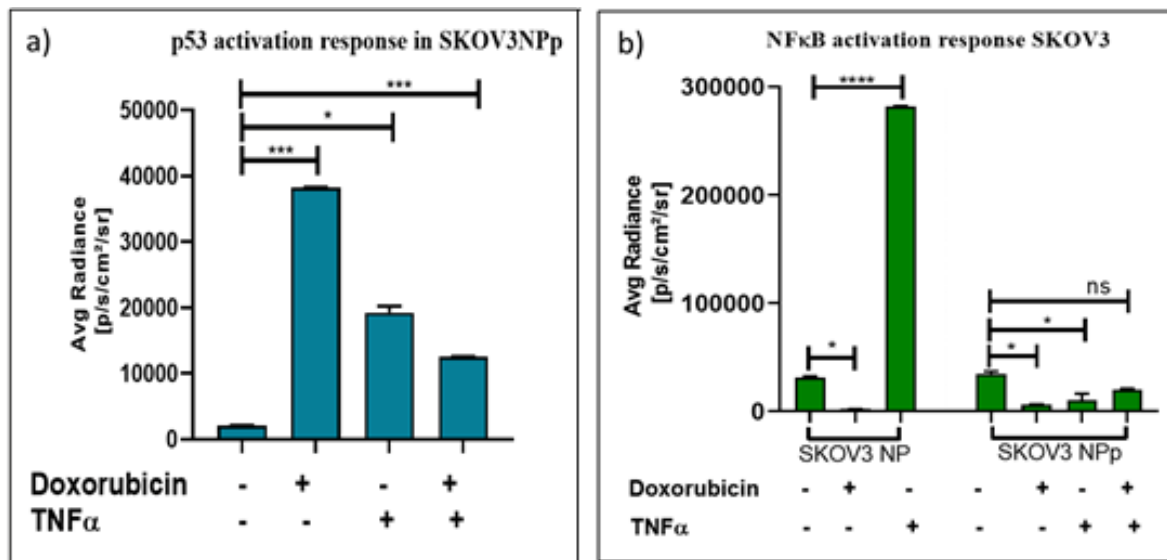

**Supplementary Figure S7.** Effect of TNF $\alpha$  (10ng/ml), Doxorubicin (1 $\mu$ g/ml), or a combination of both (a) indicating p53 activation response measured by NLuc activity, and (b) indicating NF $\kappa$ B transcriptional response measured by hLuz in SKOV3 cell line.

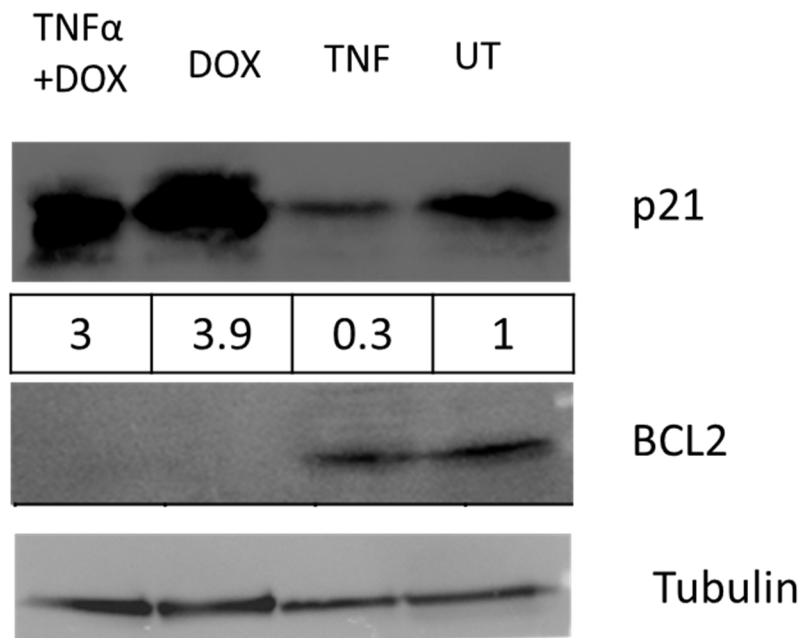

**Supplementary Figure S8.** Effect of Doxorubicin (1 $\mu$ g/ml), TNF $\alpha$ (10ng/ml) and combination treatment on p21 (p53 target protein) and BCL2 (NF $\kappa$ B target protein) expression in A2780 cell line (Treatment for 24 hrs). We observe that there is increase in p21 expression after doxorubicin treatment which validates the transcriptional activity of p53. There is slight increase in BCL2 expression with TNF $\alpha$  but drastic decrease with doxorubicin treatment.
